# Supplementary material for: Phylogenetic systematics and character evolution in the angiosperm family Haloragaceae
Source: Wiley journal article supplement (doi:10.3732/ajb.94.12.2005), 2007-12-01
Supplement: ajb22005-sup-0001.pdf [file ajb.94.12.2005&file=ajb22005-sup-0001.pdf]

MICHAEL L. MOODY AND DONALD H. LES. 2007. Phylogenetic systematics and character evolution in the angiosperm family Haloragaceae. *American Journal of Botany* 94(12): 2005-2025.

**Appendix S1:** Haloragaceae classification systems as interpreted from Schindler (1905; column 1) and Orchard (1975, 1986; column 2). Orchard did not present a formal classification at the subgeneric level. This interpretation is based on schematics of proposed relationships among species for *Gonocarpus* and *Haloragis* (Orchard 1975). The term “node” follows Orchard (1975); “Groups” were interpreted from the Orchard schematics. The *Myriophyllum* “alliances” follow the terminology of Orchard (1986).

| Halorrhagaceae (Schindler 1905)                | Haloragaceae R. Br. (Orchard 1975, 1986)      |
|------------------------------------------------|-----------------------------------------------|
| <b>Genus <i>Halorrhagis</i> [sic]</b>          | <b>Genus <i>Gonocarpus</i> Thunb.</b>         |
| <u>Subgenus <i>Pseudohalorrhagis</i> [sic]</u> | “node 1” Tetragynus                           |
| <i>H. nodulosa</i>                             | <i>G. tetragynus</i> Labill.                  |
| <u>Subgenus <i>Euhalorrhagis</i> [sic]</u>     | <i>G. incanus</i> (A. Cunn.) Orchard          |
| <u>Section <i>Monanthus</i></u>                | <i>G. mezianus</i> (Schindl.) Orchard         |
| <u>Subsection <i>Rhagocalyx</i></u>            | <i>G. elatus</i> (A. Cunn. ex. Fenzl) Orchard |
| <i>H. confertifolia</i>                        | <b>Group A</b>                                |
| <i>H. elata</i>                                | <i>G. phillippinensis</i> (Merr.) Orchard     |
| <i>H. tenuis</i>                               | <i>G. chinensis</i> (Lour.) Orchard           |
| <i>H. pycnostachya</i>                         | <i>G. implexus</i> Orchard                    |
| <u>Subsection <i>Leptocalyx</i></u>            | <b>Group B</b>                                |
| <i>H. scabra</i>                               | <i>G. acanthocarpus</i> (Brongn.) Orchard     |
| <i>H. meziana</i>                              | <i>G. leptothecus</i> (F. Muell.) Orchard     |
| <i>H. rubra</i>                                | <b>Group C</b>                                |
| <i>H. villosa</i>                              | <i>G. pycnostachyus</i> (F. Muell.) Orchard   |
| <i>H. tetragyna</i>                            | <i>G. confertifolius</i> (F. Muell.) Orchard  |
| <i>H. teucrioides</i>                          | <i>G. nodulosus</i> Nees                      |
| <i>H. aenea</i>                                | <b>Group D</b>                                |
| <i>H. aggregata</i>                            | <i>G. benthamii</i> Orchard                   |
| <i>H. longifolia</i>                           | <i>G. intricatus</i> (Benth.) Orchard         |
| <i>H. acanthocarpa</i>                         | <i>G. diffusus</i> (Diels) Orchard            |
| <u>Subsection <i>Trachycalyx</i></u>           | <i>G. rudis</i> (Benth.) Orchard              |
| <i>H. veronicifolia</i>                        | <i>G. trichostachyus</i> (Benth.) Orchard     |
| <u>Subsection <i>Macrogomphus</i></u>          | <i>G. pusillus</i> (R.Br. ex Benth.) Orchard  |
| <i>H. cordigera</i>                            | <b>Group D affiliates</b>                     |
| <i>H. pithyoides</i>                           | <i>G. micranthus</i> Thunb.                   |
| <i>H. scordioides</i>                          | <i>G. paniculatus</i> (R.Br. ex Benth.)       |
|                                                | Orchard                                       |
| <i>H. pusilla</i>                              | <i>G. hexandrus</i> (F. Muell.) Orchard       |
| <i>H. salsoloides</i>                          | <i>G. eremophilus</i> Orchard                 |
| <i>H. intricata</i>                            | <i>G. pithyoides</i> Nees                     |
| <i>H. trichnostachya</i>                       | <i>G. cordiger</i> (Fenzl) Endl. ex Nees      |

---

|                                               |                                                     |
|-----------------------------------------------|-----------------------------------------------------|
| <i>H. diffusa</i>                             | <i>G. simplex</i> (R. Br. ex Britten) Orchard       |
| <i>H. rotundifolia</i>                        | “node 2” <i>Teucroides</i>                          |
| <i>H. rudis</i>                               | <i>G. teucroides</i> DC.                            |
|                                               | <i>G. sanguinensis</i> (Merr. & Perry)              |
|                                               | Orchard                                             |
| <u>Subsection</u> <i>Lamprocalyx</i>          | <i>G. halconensis</i> (Merr.) Orchard               |
| <i>H. micrantha</i>                           | <i>G. scordioides</i> (Benth.) Orchard              |
| <i>H. depressa</i> var. <i>serpyllifolia</i>  | <i>G. salsoloides</i> Rchb. ex Spreng.              |
| <i>H. depressa</i> var. <i>montana</i>        | <i>G. serpyllifolius</i> Hook.f.                    |
| <i>H. uniflora</i>                            | <i>G. aggregatus</i> (Buchanan) Orchard             |
| <u>Section</u> <b>Pleianthus</b>              | <i>G. montanus</i> (Hook.f.) Orchard                |
| <u>Subsection</u> <i>Trachyphyllum</i>        | <u>Intermediate “node1” &amp; “node 2”</u>          |
| <i>H. glauca</i>                              | <i>G. longifolius</i> (Schindl.) Orchard            |
| <i>H. heterophylla</i>                        | <i>G. oreophilus</i> Orchard                        |
| <i>H. pinnatifida</i>                         | <i>G. humilis</i> Orchard                           |
| <i>H. viridis</i>                             | <b>Genus</b> <i>Haloragis</i> J.R.Forst. & G.Forst. |
| <i>H. foliosa</i>                             | <u>Group 1</u>                                      |
| <u>Subsection</u> <i>Sclerocalyx</i>          | <u>Subgroup A</u>                                   |
| <i>H. prostrata</i>                           | <i>H. exalata</i> F.Muell.                          |
| <i>H. platycarpa</i>                          | <i>H. serra</i> Brongn.                             |
| <u>Subsection</u> <i>Cercodia</i>             | <i>H. stricta</i> R.Br.                             |
| <i>H. erecta</i>                              | <i>H. prostrata</i> J.R.Forst. & G.Forst.           |
| <i>H. exalata</i>                             | <i>H. erecta</i> (Banks ex. Murray) Oken            |
| <i>H. laevis</i>                              | <i>H. stokesii</i> R.Br.                            |
| <i>H. pedicellata</i>                         | <i>H. masafuerana</i> Skottsb.                      |
| <i>H. cartilaginea</i>                        | <i>H. masatierrana</i> Skottsb.                     |
| <u>Subsection</u> <i>Digynium</i>             | <u>Subgroup B</u>                                   |
| <i>H. digyna</i>                              | <i>H. eichleri</i> Orchard                          |
| <i>H. serra</i>                               | <i>H. odontocarpa</i> F.Muell.                      |
| <i>H. scoparia</i>                            | <i>H. gossei</i> F.Muell.                           |
| <i>H. aculeolata</i>                          | <i>H. trigonocarpa</i> F.Muell.                     |
| <u>Subsection</u> <i>Trihalorrhagis</i> [sic] | <u>Group 2</u>                                      |
| <i>H. hexandra</i>                            | <i>H. aspera</i> Lindl.                             |
| <i>H. tenuifolia</i>                          | <i>H. uncatipila</i> Orchard                        |
| <u>Subsection</u> <i>Meionectes</i>           | <i>H. heterophylla</i> Brongn.                      |
| <i>H. brownii</i>                             | <i>H. tenuifolia</i> Benth.                         |
| <i>H. breviloba</i>                           | <i>H. brownii</i> (Hook.f.) Schindl.                |
| <u>Subsection</u> <i>Tetrapteryx</i>          | <i>H. digyna</i> Labill.                            |
| <i>H. coronopifolia</i>                       | <i>H. myriocarpa</i> Orchard                        |
| <i>H. acutangula</i>                          | <i>H. hamata</i> Orchard                            |
| <i>H. odontocarpa</i>                         | <i>H. aculeolata</i> Benth.                         |
| <u>Subsection</u> <i>Tripteryx</i>            | <i>H. scoparia</i> Fenzl                            |
| <i>H. gossei</i>                              | <i>H. foliosa</i> Benth.                            |
| <i>H. trigonocarpa</i>                        | <i>H. platycarpa</i> Benth.                         |
| <u>Subsection</u> <i>Spongiocarpus</i>        | <i>H. glauca</i> Lindl.                             |

---

---

|                                          |                                                  |
|------------------------------------------|--------------------------------------------------|
| <i>H. monosperma</i>                     | <u>Intermediate Group</u>                        |
| <i>H. racemosa</i>                       | <i>H. acutangula</i> F.Muell.                    |
| <i>H. stricta</i>                        | <b>Genus <i>Haloragodendron</i></b> Orchard      |
| <i>H. paniculata</i>                     | <i>H. racemosum</i> (Labill.) Orchard            |
| <i>H. lanceolata</i>                     | <i>H. monospermum</i> (F.Muell.) Orchard         |
| <b>Genus <i>Meziella</i></b>             | <i>H. baeuerlenii</i> (F.Muell.) Orchard         |
| <i>M. trifida</i>                        | <i>H. lucasii</i> (Maiden & Betche) Orchard      |
| <b>Genus <i>Laurembergia</i></b>         | <i>H. glandulosum</i> Orchard                    |
| 18 species (now reduced to 4)            | <b>Genus <i>Meziella</i></b> Schindl.            |
| See Meijden 1969                         | <i>M. trifida</i> (Nees) Schindl.                |
| <b>Genus <i>Loudonia</i></b>             | <b>Genus <i>Laurembergia</i></b> P.J.Bergius     |
| <i>L. aurea</i>                          | not treated                                      |
| <i>L. roei</i>                           | <b>Genus <i>Glischrocaryon</i></b> Endl.         |
| <i>L. behrii</i>                         | <i>G. flavescens</i> (Drumm.) Orchard            |
| <b>Genus <i>Proserpinaca</i></b>         | <i>G. aureum</i> (Lindl.) Orchard                |
| <i>P. palustris</i>                      | <i>G. roei</i> Endl.                             |
| <i>P. pectinata</i>                      | <i>G. behrii</i> (Schindl.) Orchard              |
| <b>Genus <i>Myriophyllum</i></b>         | <b>Genus <i>Proserpinaca</i></b> L.              |
| <u>Subgenus <i>Eumyriophyllum</i></u>    | not treated                                      |
| <u>Section <i>Pentapteris</i></u>        | <b>Genus <i>Myriophyllum</i></b> L.              |
| <u>Subsection <i>Spirophyllum</i></u>    | <u><i>M. aquaticum</i></u> Alliance              |
| <i>M. gracile</i>                        | <i>M. aquaticum</i> (Vellozo) Verd.              |
| <i>M. trachycarpum</i>                   | <i>M. robustum</i> Hook.f.                       |
| <i>M. filiforme</i>                      | <u><i>M. aquaticum</i></u> Alliance Associates   |
| <u>Subsection <i>Pelonastes</i></u>      | <i>M. verticillatum</i> L.                       |
| <i>M. tillaeoides</i>                    | <i>M. heterophyllum</i> Michx.                   |
| <i>M. longibracteolatum</i>              | <i>M. hippuroides</i> Nutt.                      |
| <i>M. pedunculatum</i>                   | <u><i>M. salsugineum</i></u> Alliance            |
| <i>M. votschii</i>                       | <i>M. salsugineum</i> Orchard                    |
| <i>M. amphibium</i>                      | <i>M. quitense</i> Kunth.                        |
| <u>Subsection <i>Spondylophyllum</i></u> | <i>M. triphyllum</i> Orchard                     |
| <i>M. ussuriense</i>                     | <i>M. caput-medusae</i> Orchard                  |
| <i>M. robustum</i>                       | <i>M. porcatum</i> Orchard                       |
| <i>M. verticillatum</i>                  | <i>M. verrucosum</i> Lindl.                      |
| <i>M. propinquum</i>                     | <u><i>M. salsugineum</i></u> Alliance Associates |
| <i>M. brasiliense</i>                    | <i>M. spicatum</i> L.                            |
| <i>M. spicatum</i>                       | <i>M. muelleri</i> Sond.                         |
| <i>M. verrucosum</i>                     | <i>M. decussatum</i> Orchard                     |
| <i>M. elatinoides</i>                    | <i>M. indicum</i> Willd.                         |
| <i>M. indicum</i>                        | <i>M. tetrandrum</i> Roxb.                       |
| <i>M. latifolium</i>                     | <u><i>M. propinquum</i></u> Alliance             |
| <u>subsection <i>Leiocarpium</i></u>     | <i>M. propinquum</i> A. Cunn.                    |
| <i>M. alterniflorum</i>                  | <i>M. variifolium</i> Hook.f.                    |
| <i>M. muelleri</i>                       | <i>M. simulans</i> Orchard                       |
| <u>Section <i>Tessaronia</i></u>         | <i>M. alpinum</i> Orchard                        |

---

---

|                                         |                                                    |
|-----------------------------------------|----------------------------------------------------|
| <u>Subsection <i>Trachycarpaeum</i></u> | <i>M. crispatum</i> Orchard                        |
| <i>M. tetrandrum</i>                    | <i>M. ussuriense</i> Maxim.                        |
| <i>M. tuberculatum</i>                  | <u><i>M. propinquum</i> Alliance Associates</u>    |
| <i>M. intermedium</i>                   | <i>M. papillosum</i> Orchard                       |
| <i>M. axilliflorum</i>                  | <i>M. latifolium</i> F.Muell.                      |
| <u>Subsection <i>Spondylastrum</i></u>  | <u><i>M. muricatum</i> Alliance</u>                |
| <i>M. heterophyllum</i>                 | <i>M. muricatum</i> Orchard                        |
| <i>M. hippuroides</i>                   | <i>M. tuberculatum</i> Roxb.                       |
| <i>M. pinnatum</i>                      | <u><i>M. muricatum</i> Alliance Associates</u>     |
| <i>M. sparsiflorum</i>                  | <i>M. dicoccum</i> F.Muell.                        |
| <u>Subsection <i>Ptilophyllum</i></u>   | <i>M. balladoniense</i> Orchard                    |
| <i>M. humile</i>                        | <u><i>M. striatum</i> Alliance</u>                 |
| <i>M. laxum</i>                         | <i>M. implicatum</i> Orchard                       |
| <i>M. tenellum</i>                      | <i>M. striatum</i> Orchard                         |
| <u>Subgenus <i>Brachytheca</i></u>      | <i>M. costatum</i> Orchard                         |
| <i>M. integrifolium</i>                 | <u><i>M. striatum</i> Alliance Associates</u>      |
| <i>M. drummondii</i>                    | <i>M. gracile</i> Benth.                           |
| <i>M. glomeratum</i>                    | <i>M. trachycarpum</i> F.Muell.                    |
| <u>Subgenus <i>Dicarpum</i></u>         | <i>M. filiforme</i> Benth.                         |
| <i>M. megianum</i>                      | <i>M. petraeum</i> Orchard                         |
| <i>M. dicoccum</i>                      | <u><i>M. megianum</i> Alliance</u>                 |
| <b>Genus <i>Gunnera</i></b>             | <i>M. coronatum</i> Meijden                        |
|                                         | <i>M. megianum</i> Schindl.                        |
|                                         | <i>M. siamense</i> (Craib) Tardieu                 |
|                                         | <i>M. bonii</i> Tardieu                            |
|                                         | <u><i>M. integrifolium</i> Alliance</u>            |
|                                         | <i>M. limnophilum</i> Orchard                      |
|                                         | <i>M. integrifolium</i> Hook.f.                    |
|                                         | <i>M. drummondii</i> Benth.                        |
|                                         | <i>M. echinatum</i> Orchard                        |
|                                         | <u><i>M. integrifolium</i> Alliance Associates</u> |
|                                         | <i>M. glomeratum</i> Schindl.                      |
|                                         | <u><i>M. callitrichoides</i> Alliance</u>          |
|                                         | <i>M. callitrichoides</i> Orchard                  |
|                                         | <u><i>M. pedunculatum</i> Alliance</u>             |
|                                         | <i>M. amphibium</i> Labill.                        |
|                                         | <i>M. pedunculatum</i> Hook.f.                     |
|                                         | <i>M. tillaeoides</i> Diels                        |
|                                         | <u><i>M. pedunculatum</i> Alliance Associates</u>  |
|                                         | <i>M. lophatum</i> Orchard                         |
|                                         | <i>M. austropygmaeum</i> Orchard                   |
|                                         | <i>M. votschii</i> Schindl.                        |
|                                         | <i>M. pygmaeum</i> Mattf.                          |

---
